# Supplementary material
Source: HighWire-hosted journal article supplement (https://heart.bmj.com/content/106/19/1469)
Supplement: inline-supplementary-material-1 [file inline-supplementary-material-1.pdf]

**Supplemental Table 1.** Strengths and limitations of the various imaging modalities in assessing the right ventricle.

|                                                     | 2DE     | 3DE      | CMR                                                                                                                                                                                             | CT                                                                                                                                                           |
|-----------------------------------------------------|---------|----------|-------------------------------------------------------------------------------------------------------------------------------------------------------------------------------------------------|--------------------------------------------------------------------------------------------------------------------------------------------------------------|
| <b>Technical aspects</b>                            |         |          |                                                                                                                                                                                                 |                                                                                                                                                              |
| Availability                                        | High    | Moderate | Moderate                                                                                                                                                                                        | Low                                                                                                                                                          |
| Cost                                                | Low     | Low      | High                                                                                                                                                                                            | Moderate                                                                                                                                                     |
| Typical scan duration (min)                         | 25-30   | 30-35    | 40-60                                                                                                                                                                                           | 10-15                                                                                                                                                        |
| Safety                                              | High    | High     | Contraindicated in patients with metallic implants<br>Claustrophobia<br>Potentially nephrotoxic contrast<br>Allergic reaction to contrast<br>Restricted only to hemodynamically stable patients | <ul style="list-style-type: none"> <li>• Ionizing radiations</li> <li>• Potentially nephrotoxic contrast</li> <li>• Allergic reaction to contrast</li> </ul> |
| Imaging window dependence                           | Present | Present  | Absent                                                                                                                                                                                          | Absent                                                                                                                                                       |
| Temporal resolution                                 | +++     | ++       | ++                                                                                                                                                                                              | +                                                                                                                                                            |
| Spatial resolution                                  | +++     | ++       | +++                                                                                                                                                                                             | ++++                                                                                                                                                         |
| 3D acquisition                                      | No      | Yes      | Only in selected sequences                                                                                                                                                                      | Yes                                                                                                                                                          |
| Real-time 3D imaging                                | No      | Yes      | Yes, but with limitations                                                                                                                                                                       | No                                                                                                                                                           |
| <b>Assessment of RV geometry, size and function</b> |         |          |                                                                                                                                                                                                 |                                                                                                                                                              |
| Evaluation of RV wall thickness                     | Yes     | Yes      | Yes                                                                                                                                                                                             | Yes                                                                                                                                                          |

|                                     |                                                                                                                                                                                                                                                                                                                                                                                                                                                                                                                                                                                                                                                                                |          |          |          |
|-------------------------------------|--------------------------------------------------------------------------------------------------------------------------------------------------------------------------------------------------------------------------------------------------------------------------------------------------------------------------------------------------------------------------------------------------------------------------------------------------------------------------------------------------------------------------------------------------------------------------------------------------------------------------------------------------------------------------------|----------|----------|----------|
| Determination of RV diameters       | ++                                                                                                                                                                                                                                                                                                                                                                                                                                                                                                                                                                                                                                                                             | +++      | ++++     | ++++     |
| Accuracy of RV volume               | -                                                                                                                                                                                                                                                                                                                                                                                                                                                                                                                                                                                                                                                                              | +++      | ++++     | ++++     |
| Accuracy of RV EF                   | -                                                                                                                                                                                                                                                                                                                                                                                                                                                                                                                                                                                                                                                                              | +++      | ++++     | ++++     |
| Parameters of RV systolic function  | FAC, TAPSE, TDI S                                                                                                                                                                                                                                                                                                                                                                                                                                                                                                                                                                                                                                                              | EF       | EF       | EF       |
| Estimation of RV diastolic function | Rarely used in clinical practice                                                                                                                                                                                                                                                                                                                                                                                                                                                                                                                                                                                                                                               | Not used | Not used | Not used |
| <b>Evaluation of RV mechanics</b>   | +++                                                                                                                                                                                                                                                                                                                                                                                                                                                                                                                                                                                                                                                                            | +        | ++++     | +++      |
| <b>Major limitations</b>            | <ul style="list-style-type: none"> <li>• Inability to acquire the whole RV in one view</li> <li>• Geometric assumptions</li> <li>• Poor visualization of RV endocardial border</li> <li>• Lack of spatial orientation</li> <li>• Need of stable cardiac rhythm and cooperative patients</li> <li>• Visualization of RV endocardial border</li> <li>• No data about RV mass</li> <li>• Costs</li> <li>• Low availability</li> <li>• Challenging identification of the RVOT boundaries</li> <li>• Thin RV wall</li> <li>• Ionizing radiation</li> <li>• Potentially nephrotoxic contrast</li> <li>• Stable cardiac rhythm with a low heart rate for image acquisition</li> </ul> |          |          |          |

**Abbreviations:** +, low; ++, moderate; +++, high; +++, very high; -, major limitation of the modality; 3D, three-dimensional; EF, ejection fraction; FAC, fractional area change; R, right ventricle; s, systolic velocity of the myocardium of the basal segment of the free-wall; TAPSE, tricuspid annular plane systolic excursion
