# Supplementary material
Source: HighWire-hosted journal article supplement (https://heart.bmj.com/content/106/19/1469)
Supplement: inline-supplementary-material-3 [file inline-supplementary-material-3.pdf]

**Supplemental Table 3.** Studies assessing the value of right ventricular longitudinal strain in heart

failure patients

| First Author,<br>Journal, Year                        | Study population                                 | Sample<br>size (n) | Design        | Metrics             | Results                                                                                                                                                                                                                   | Cut-off va        |
|-------------------------------------------------------|--------------------------------------------------|--------------------|---------------|---------------------|---------------------------------------------------------------------------------------------------------------------------------------------------------------------------------------------------------------------------|-------------------|
| Verhaert D, <i>Circ Heart Fail</i> , 2010(1)          | Acute decompensated heart failure                | 62                 | Prospective   | RVFWLS              | Among all the RV functional indices measured, only the improvement in RFWLS at 48 to 72 hours was associated with lower adverse events                                                                                    | -                 |
| Guendouz S, <i>Circ J</i> , 2012(2)                   | Clinically stable HFrEF (LVEF 28±8%) outpatients | 104                | Prospective   | RV4CLS              | RV4CLS and log B-type natriuretic peptide predicted severe adverse events independently on other echocardiographic parameters of RV or LV systolic function                                                               | -21               |
| Sade et al, <i>J Am Soc Echocardiogr</i> , 2013(3)    | Patients treated with CRT                        | 120                | Prospective   | RVFWLS              | RV dysfunction was independently associated with the composite outcome of all-cause death, heart transplantation and need of LV assistance. Among RV function parameters, RVFWLS was the most powerful to predict outcome | -18               |
| Motoki et al. <i>J Am Soc Echocardiogr</i> , 2014(4)  | Stable, HFrEF (LVEF< 35%) outpatients            | 171                | Retrospective | RV4CLS <sup>a</sup> | RV4CS showed an independent association with cardiac events (death, hospitalization for heart failure, and heart transplant) regardless of age, LVEF, and E/e' ratio and had greater prognostic power than LVEF           | -14               |
| Lisi et al, <i>JACC Cardiovasc Imaging</i> , 2015(5)  | End-stage heart failure                          | 27                 | Prospective   | RVFWLS              | RVFWLS was the most accurate parameter that correlated with the extent of RV myocardial fibrosis and functional capacity.                                                                                                 | -                 |
| Iacoviello et al, <i>Echocardiography</i> , 2016(6)   | Stable, HFrEF (LVEF< 45%) outpatients            | 332                | -             | RVFWLS<br>RV4CLS    | Both RV4CLS and RVFWLS (but not TAPSE, FAC and S-wave velocity) were associated with all-cause mortality during follow-up                                                                                                 | RV4CLS<br>RVFWLS= |
| Freed et al, <i>Circ Cardiovasc Imaging</i> , 2016(7) | HFpEF                                            | 308                | Prospective   | RVFWLS <sup>b</sup> | RVFWLS was independently associated with composite outcome of cardiovascular hospitalization or death                                                                                                                     | -                 |
| Morris et al, <i>Eur</i>                              | Asymptomatic                                     | 642                | Multicenter,  | RVFWLS              | RV4CLS and RVFWLS were able to detect subtle RV longitudinal systolic abnormalities in a significant                                                                                                                      | -                 |

|                                                            |                                                                              |     |             |                  |                                                                                                                                                                                                                                                           |     |
|------------------------------------------------------------|------------------------------------------------------------------------------|-----|-------------|------------------|-----------------------------------------------------------------------------------------------------------------------------------------------------------------------------------------------------------------------------------------------------------|-----|
| <i>Heart J Cardiovasc Imaging</i> , 2017(8)                | pts at risk, HFpEF, and HFrEF                                                |     | prospective | RV4CLS           | proportion of patients with HFrEF and to a lesser extent in HFpEF despite the conventional echocardiographic parameters of RV function were preserved In addition, RV4CLS and RVFWLS were significantly linked to the symptomatic status of the patients. |     |
| Seo et al, <i>Eur Heart J Cardiovasc Imaging</i> , 2019(9) | Clinically stable outpatients with first diagnosis of dilated cardiomyopathy | 143 | Prospective | RVFWLS<br>RV4CLS | RVFWLS, but not conventional echocardiographic indices of RV function, independently predicted MACE                                                                                                                                                       | 16. |

All the reported studies used GE Healthcare ultrasound systems and software packages except <sup>a</sup>Syngo Velocity Vector Imagng (Siemens Healthineer, Munich, D), <sup>b</sup>2D Cardiac Performance Analysis v4.5 (TomTec Imaging Systems, Unterschleissen, D)

**Abbreviations:** FAC, right ventricular fractional area change; HFpEF, heart failure and preserved left ventricular ejection fraction; HFrEF, heart failure and reduced left ventricular ejection fraction; LV, left ventricle/ventricular; LVEF; left ventricular ejection fraction; MACE, major adverse cardiac events; TAPSE; tricuspid annular plane systolic excursion; all remaining abbreviations as in

Supplemental Table 2

## References

1. Verhaert D, Mullens W, Borowski A et al. Right ventricular response to intensive medical therapy in advanced decompensated heart failure. *Circulation Heart failure* 2010;3:340-6.
2. Guendouz S, Rappeneau S, Nahum J et al. Prognostic significance and normal values of 2D strain to assess right ventricular systolic function in chronic heart failure. *Circulation journal : official journal of the Japanese Circulation Society* 2012;76:127-36.
3. Sade LE, Ozin B, Atar I, Demir O, Demirtas S, Muderrisoglu H. Right ventricular function is a determinant of long-term survival after cardiac resynchronization therapy. *Journal of the American Society of Echocardiography : official publication of the American Society of Echocardiography* 2013;26:706-13.
4. Motoki H, Borowski AG, Shrestha K et al. Right ventricular global longitudinal strain provides prognostic value incremental to left ventricular ejection fraction in patients with heart failure. *Journal of the American Society of Echocardiography : official publication of the American Society of Echocardiography* 2014;27:726-32.

5. Lisi M, Cameli M, Righini FM et al. RV Longitudinal Deformation Correlates With Myocardial Fibrosis in Patients With End-Stage Heart Failure. *JACC Cardiovascular imaging* 2015;8:514-522.
6. Iacoviello M, Citarelli G, Antoncetti V et al. Right Ventricular Longitudinal Strain Measures Independently Predict Chronic Heart Failure Mortality. *Echocardiography* 2016;33:992-1000.
7. Freed BH, Daruwalla V, Cheng JY et al. Prognostic Utility and Clinical Significance of Cardiac Mechanics in Heart Failure With Preserved Ejection Fraction: Importance of Left Atrial Strain. *Circ Cardiovasc Imaging* 2016;9.
8. Morris DA, Krisper M, Nakatani S et al. Normal range and usefulness of right ventricular systolic strain to detect subtle right ventricular systolic abnormalities in patients with heart failure: a multicentre study. *European heart journal cardiovascular Imaging* 2017;18:212-223.
9. Seo J, Jung IH, Park JH et al. The prognostic value of 2D strain in assessment of the right ventricle in patients with dilated cardiomyopathy. *European heart journal cardiovascular Imaging* 2019;20:1043-1050.
