# Supplementary material
Source: HighWire-hosted journal article supplement (https://heart.bmj.com/content/106/19/1469)
Supplement: inline-supplementary-material-4 [file inline-supplementary-material-4.pdf]

**Supplemental Table 4.** Studies assessing the value of right ventricular longitudinal strain in patients with chronic ischemic heart disease or acute coronary syndromes

| First Author, Journal, Year                               | Study population                                              | Sample size (n) | Design        | Metrics             | Results                                                                                                                                                                                                                           | Cut-off value |
|-----------------------------------------------------------|---------------------------------------------------------------|-----------------|---------------|---------------------|-----------------------------------------------------------------------------------------------------------------------------------------------------------------------------------------------------------------------------------|---------------|
| Antoni ML et al. <i>Circ Cardiovasc Imaging</i> , 2010(1) | STEMI treated with primary percutaneous coronary intervention | 621             | Prospective   | RVFWLS              | Only RV fractional area change and RVFWLS independently predicted the composite end point at 1 year. RVFWLS provided incremental value to clinical information, infarct characteristic, LV function and RV fractional area change | -22.1         |
| Park JH et al, <i>J Cardiovasc Ultrasound</i> , 2014(2)   | Chronic ischemic heart disease                                | 72              | Retrospective | RV4CLS <sup>a</sup> | RVFWLS showed significant correlation with RVEF obtained with CMR. Patients with RV4CLS less negative than 15.4 had worse prognosis at 1 year.                                                                                    | -15.4         |
| Park SJ et al. <i>JACC Cardiovasc Imaging</i> , 2015(3)   | Inferior STEMI                                                | 282             | Prospective   | RV4CLS <sup>a</sup> | RV4CLS showed a higher c-statistic value than RV fractional area change and TAPSE in addition to age, Killip class, troponin-I, LVEF and RV infarction to predict mortality and MACE at 5 years                                   | -15.5         |
| Chang WT et al, <i>J Am Soc Echocardiogr</i> , 2016(4)    | Chronic angina and proven coronary artery disease             | 208             | Retrospective | RVFWLS              | RVFWLS was an independent prognostic factor for both cardiovascular mortality and hemodynamically unstable ventricular arrhythmia                                                                                                 | -18           |
| Gorter TM et al, <i>Am J Cardiol</i> , 2016(5)            | STEMI treated with primary percutaneous coronary intervention | 258             | Prospective   | RVFWLS              | RV dysfunction occurs in 1/3 of STEMI patients treated with primary PCI. However, it is reversible in most patients                                                                                                               | -20           |
| Goedemans L et al. <i>J Am Soc Echocardiogr</i> , 2019(6) | STEMI and chronic obstructive pulmonary disease               | 117             | Retrospective | RVFWLS              | STEMI patients with relatively preserved LVEF, and COPD had significantly worse RVFWSL compared with patients without COPD. Moreover, RVFWSL > -20% was independently associated with worse survival.                             | -20           |

All the reported studies used GE Healthcare ultrasound systems and software packages except

<sup>a</sup>Syngo Velocity Vector Imaging (Siemens Healthineer, Munich, D), <sup>b</sup>2D Cardiac Performance Analysis v4.5 (TomTec Imaging Systems, Unterschleissen, D)

**Abbreviations:** FAC, right ventricular fractional area change; HFpEF, heart failure and preserved left ventricular ejection fraction; HFrEF, heart failure and reduced left ventricular ejection fraction; LV,

left ventricle/ventricular; LVEF; left ventricular ejection fraction; MACE, major adverse cardiac events; TAPSE; tricuspid annular plane systolic excursion; all remaining abbreviations as in Table 2

## References

1. Antoni ML, Scherptong RW, Atary JZ et al. Prognostic value of right ventricular function in patients after acute myocardial infarction treated with primary percutaneous coronary intervention. *Circ Cardiovasc Imaging* 2010;3:264-71.
2. Park JH, Negishi K, Kwon DH, Popovic ZB, Grimm RA, Marwick TH. Validation of global longitudinal strain and strain rate as reliable markers of right ventricular dysfunction: comparison with cardiac magnetic resonance and outcome. *Journal of cardiovascular ultrasound* 2014;22:113-20.
3. Park SJ, Park JH, Lee HS et al. Impaired RV global longitudinal strain is associated with poor long-term clinical outcomes in patients with acute inferior STEMI. *JACC Cardiovascular imaging* 2015;8:161-9.
4. Chang WT, Liu YW, Liu PY et al. Association of Decreased Right Ventricular Strain with Worse Survival in Non-Acute Coronary Syndrome Angina. *Journal of the American Society of Echocardiography : official publication of the American Society of Echocardiography* 2016;29:350-358 e4.
5. Gorter TM, Lexis CP, Hummel YM et al. Right Ventricular Function After Acute Myocardial Infarction Treated With Primary Percutaneous Coronary Intervention (from the Glycometabolic Intervention as Adjunct to Primary Percutaneous Coronary Intervention in ST-Segment Elevation Myocardial Infarction III Trial). *Am J Cardiol* 2016;118:338-44.
6. Goedemans L, Hoogslag GE, Abou R et al. ST-Segment Elevation Myocardial Infarction in Patients With Chronic Obstructive Pulmonary Disease: Prognostic Implications of Right Ventricular Systolic Dysfunction as Assessed with Two-Dimensional Speckle-Tracking Echocardiography. *Journal of the American Society of Echocardiography : official publication of the American Society of Echocardiography* 2019;32:1277-1285.
